1           **A transcriptional constraint mechanism limits the homeostatic response to**  
2                           **activity deprivation in mammalian neocortex**

3

4                           Abbreviated Title: HLF and TEF regulate homeostatic plasticity

5

6

7 Vera Valakh, Xiaoyue Aelita Zhu, Derek Wise, Stephen Van Hooser, Robin Schectman, Isabel  
8 Cepeda, Ryan Kirk, Sean O'Toole, Sacha B. Nelson.

9

10

11   **Proofs and correspondence to:**

12 Sacha B Nelson, MD, PhD, Brandeis University

13 Department of Biology, MS 008, 415 South Street, Waltham, MA 02454,

14 Email: [nelson@brandeis.edu](mailto:nelson@brandeis.edu)

15

16 Declaration of Interest: The authors declare no competing financial interests.

17 Acknowledgements: This research was supported by the National Institute of Neurological  
18 Disease and Stroke and by the Simons Foundation for Autism Research.

19

## 20 **Abstract**

21 Healthy neuronal networks rely on homeostatic plasticity to maintain stable firing rates despite  
22 changing synaptic drive. These mechanisms, however, can themselves be destabilizing if  
23 activated inappropriately or excessively. For example, prolonged activity deprivation can lead to  
24 rebound hyperactivity and seizures. While many forms of homeostasis have been described,  
25 whether and how the magnitude of homeostatic plasticity is constrained remains unknown. Here  
26 we uncover negative regulation of cortical network homeostasis by PAR bZIP family of  
27 transcription factors. In their absence the network response to prolonged activity withdrawal is  
28 too strong and this is driven by exaggerated upregulation of recurrent excitatory synaptic  
29 transmission. These data indicate that transcriptional activation is not only required for many  
30 forms of homeostatic plasticity but is also involved in restraint of the response to activity  
31 deprivation.

32

## 33 **Introduction**

34 Neuronal networks are equipped with a set of homeostatic plasticity mechanisms that enable  
35 them to rebalance activity following perturbations during development, learning, or disease.  
36 Homeostatic plasticity can alter the intrinsic excitability of individual neurons, as well as the  
37 strength and number of both excitatory and inhibitory synapses (Davis, 2006; Turrigiano and  
38 Nelson, 2004). Synaptic changes can occur post- (Turrigiano et al., 1998) or presynaptically  
39 (Delvendahl and Müller, 2019) and may scale quantal amplitudes and alter the frequency of  
40 quantal events. These changes are homeostatic because they occur in the direction needed to  
41 rebalance the network after activity perturbation. Especially during development, homeostatic  
42 mechanisms are strong and can be maladaptive if they overshoot or are activated  
43 inappropriately (Nelson and Valakh, 2015).

44 Despite recognition of the significance of homeostatic plasticity, whether and how its strength is  
45 normally constrained has remained unknown. Downregulation of the strength of homeostatic  
46 plasticity could potentially provide protection against inappropriate or excessive activation of  
47 these mechanisms. However, such negative regulators of homeostatic plasticity have not been  
48 previously described.

49 Here we investigate the role of the proline and acidic amino acid-rich basic leucine zipper (PAR  
50 bZIP) family of transcription factors (TF) in homeostatic plasticity. The family consists of hepatic  
51 leukemia Factor (HLF), thyrotroph embryonic factor (TEF), and albumin D-site-binding protein  
52 (DBP) which are thought to act as transcriptional activators, as well as E4 Promoter-Binding  
53 Protein 4 (E4BP4, currently known as Nfil3) that acts as a transcriptional repressor (Mitsui et al.,  
54 2001). All 4 family members share the same DNA binding motif. DBP is a circadian gene  
55 controlled by CLOCK and oscillates with circadian rhythm (Ripperger et al., 2000). Other family  
56 members are also controlled by CLOCK (Li et al., 2017). However, while these TFs typically  
57 have oscillatory behavior in peripheral tissue, they do not oscillate in the brain outside of the  
58 SCN (Gachon et al., 2004). Loss of HLF, TEF and DBP has been associated with epilepsy  
59 (Gachon et al., 2004; Hawkins and Kearney, 2016; Rambousek et al., 2020) suggesting they  
60 are important in regulating network activity.

61 In order to investigate the role that gene transcription plays in regulating the neuronal response  
62 to activity deprivation, we profiled changes in gene expression engaged during homeostatic  
63 plasticity and found that prolonged activity deprivation activates a robust transcriptional program

64 involving the PAR bZIP TF family members HLF and TEF. Both act to restrain the expression of  
65 homeostatic plasticity. While they have limited effects on network function at baseline, they  
66 strongly suppress the upregulation of homeostatic changes, mainly by regulating recurrent  
67 excitatory synaptic connections. Together these results indicate that homeostatic plasticity is  
68 itself subject to activity-dependent regulation and is transcriptionally restrained by the PAR bZIP  
69 TFs HLF and TEF.

70

## 71 **Results**

### 72 **PAR bZIP transcripts increase during activity deprivation**

73 Certain forms of homeostatic plasticity require transcription (Goold and Nicoll, 2010; Ibata et al.,  
74 2008) and activity perturbation results in changes in gene expression (Schaukowitch et al.,  
75 2017). We hypothesized that among the differentially expressed genes, some induce or regulate  
76 homeostatic changes. To identify novel genes involved in the homeostatic response to activity  
77 deprivation, we measured gene expression in excitatory and inhibitory neurons in organotypic  
78 slice cultures following a global decrease in activity. We cut coronal slices including neocortex at  
79 p7 and cultured them for 5 days. During this culture period the neurons reform connections, and  
80 spontaneous bouts of activity, termed up states, emerge (Johnson and Buonomano, 2007; Koch  
81 et al., 2010). To broadly block activity, we applied the voltage-gated sodium channel blocker  
82 tetrodotoxin, TTX (0.5 $\mu$ M), for 5 days during an early developmental period (equivalent  
83 postnatal day, EP, 12-17). This manipulation induces a robust homeostatic program and  
84 profoundly changes network dynamics (Koch et al., 2010; Schaukowitch et al., 2017). To  
85 characterize the changes in gene expression, we sorted deep layer (L5 and L6) pyramidal and  
86 PV<sup>+</sup> interneurons and performed RNA sequencing to look for transcripts that change following  
87 prolonged silencing. Inactivity activates a robust transcriptional program of both positively and  
88 negatively affected genes (Figure 1A) consistent with data from dissociated hippocampal  
89 cultures (Schaukowitch et al., 2017). To identify potential regulators of homeostatic plasticity, we  
90 looked for genes upregulated in the TTX condition. We identified a PAR bZIP family of  
91 transcription factors including *Hlf*, *Tef*, and *Dbp*. Expression levels of *Dbp* are much lower than  
92 those of *Hlf* and *Tef* (<3 TPM in excitatory and PV<sup>+</sup> inhibitory neurons), suggesting that this last  
93 family member may play a more limited role in the neocortex. Both *Hlf* and *Tef* are robustly  
94 upregulated after 5 days of activity deprivation in both excitatory (Fold Change TTX/control; FC  
95 = 2.6, 2.5; adjusted p-value;  $p_{\text{adj}} = 1.3\text{e-}8, 3.8\text{e-}4,$ ) and inhibitory neurons (FC = 7.0, 2.1;  $p_{\text{adj}} =$   
96 4.6e-39, 2.0e-3), while *Nfil3* and *Dbp* were not (FC = 0.51, 1.9;  $p_{\text{adj}} = 0.49, 0.80,$  excitatory; FC=  
97 1.2, 1.4;  $p_{\text{adj}} = 0.84, 0.79$  inhibitory).

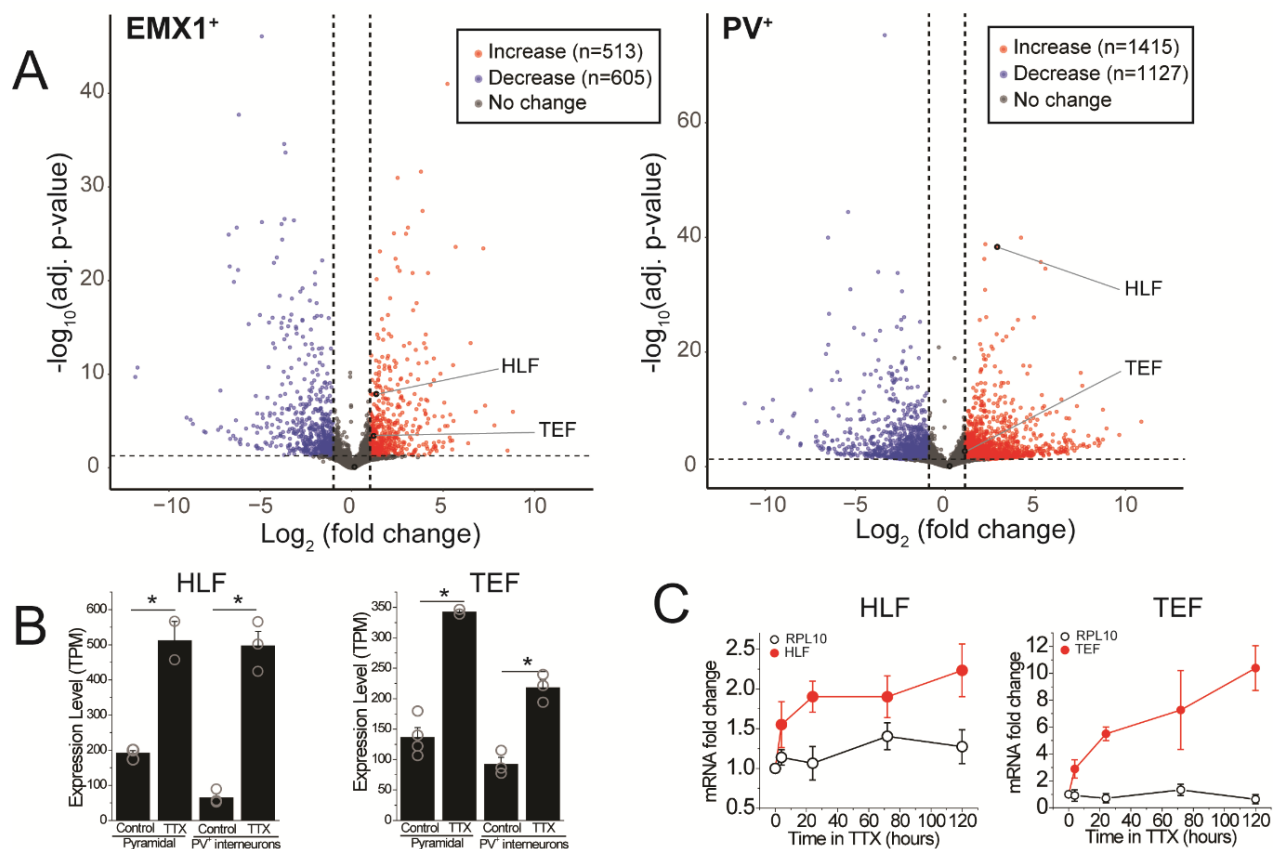

98

99 **Figure 1. RNA-seq identifies transcripts affected by activity deprivation including the PAR**  
 100 **bZIP family of transcription factors. (A)** Volcano plots of bulk RNA-seq from sorted fluorescently  
 101 labeled pyramidal cells (left) and PV<sup>+</sup> interneurons (right). Dashed lines indicate a Fold-change of 2 and  
 102 adjusted p-value of 0.05. Differential expression analysis revealed that TTX resulted in upregulation (513  
 103 in pyramidal, 1415 in PV<sup>+</sup> interneurons) as well as downregulation (605 in pyramidal, 1127 in PV<sup>+</sup>  
 104 interneurons) of genes, among which *Hlf* and *Tef* were identified as upregulated with activity block in both  
 105 excitatory and inhibitory neurons. Statistical analysis (Wald test followed by Benjamini-Hochberg  
 106 correction) reveals that *Hlf* and *Tef* are significantly upregulated in both pyramidal cells and PV<sup>+</sup>  
 107 interneurons, while *Dbp* and *Nfil3* are not significantly altered in either cell type. **(B)** Bar graphs displaying  
 108 transcript per million (TPM) values of *Hlf* (left panel) and *Tef* (right panel) in pyramidal cells (left) and  
 109 interneurons (right) in control and 5-day TTX treated slices. Bars are mean values, open symbols are  
 110 individual experiments. **(C)** Quantitative real-time PCR analysis of *Hlf* and *Tef* expression in whole cortex  
 111 lysates following a time course of activity deprivation. Two-way ANOVA reveals significant differences  
 112 between *Hlf/Tef* and RPL10 ( $p < 0.05$ ) and between *Hlf/Tef* expression at different time points ( $p < 0.05$ ).

113

114 To validate this finding and to further dissect the time course of PAR bZIP transcription factors  
 115 expression, we isolated the whole cortex from slice cultures and measured *Hlf* and *Tef* transcript  
 116 levels at various time points during activity deprivation using real-time quantitative PCR. We find  
 117 that upregulation occurs soon after activity withdrawal, since by 4 hours of TTX application the  
 118 level of both TFs is already significantly elevated (Figure 1C), consistent with previous findings  
 119 in dissociated hippocampal cultures (Schaukowitch et al., 2017). We also find that *Hlf* and *Tef*  
 120 continue to increase with time, suggesting that their upregulation correlates with how long the  
 121 network has been silenced.

## 122 PAR bZIP TFs restrain network homeostatic plasticity

123 Since *Hlf* and *Tef* are progressively upregulated during prolonged TTX treatment, which can  
124 lead to subsequent epilepsy (Galvan et al., 2000; Scharfman, 2002), we entertained the  
125 hypothesis that they may contribute to the homeostatic increase in network excitability following  
126 activity deprivation. On the other hand, loss of function of members of the PAR bZIP family of  
127 TFs are also associated with epileptic phenotypes (Hawkins and Kearney, 2012, 2016;  
128 Rambousek et al., 2020). Specifically, triple knockout (TKO) *Hlf*<sup>-/-</sup>/*Dbp*<sup>-/-</sup>/*Tef*<sup>-/-</sup> mice have epilepsy  
129 (Gachon et al., 2004). One possibility that reconciles this apparent conflict is that instead of  
130 driving homeostatic changes, *Hlf* and *Tef* are upregulated in the TTX condition to restrain  
131 homeostatic responses. To test this hypothesis, we investigated the role that these TFs play in  
132 homeostatic plasticity. We induced homeostatic upregulation of network function by two-day  
133 TTX application in organotypic slice cultures and measured network activity after TTX removal.

134 As a read-out of network activity, we measured changes in intracellular calcium using virally-  
135 delivered GCaMP6f in primary somatosensory cortex (Figure 2A). In untreated slices at  
136 baseline, the neurons display population activity organized into complex, infrequent up states  
137 which are similar to those observed in vivo (Figure 2B, Sanchez-Vives and McCormick, 2000).  
138 The activity of cells from slices derived from the TKO are indistinguishable from wild type (WT)  
139 at baseline (Figure 2). After two days of TTX treatment, the frequency of the up states  
140 increases. To quantify network activity, we measured the frequency of Ca<sup>2+</sup> peaks in each  
141 recording (see methods for detailed description of quantitative analysis). While 2 days of TTX  
142 incubation increases the peak frequency two-fold in WT slices, the same silencing duration  
143 produces a four-fold increase in the TKO slices (Figure 2). These data suggest that the PAR  
144 BZIP family of TFs normally functions to restrain homeostatic plasticity, and in their absence,  
145 the homeostatic response is exaggerated. Moreover, even though the mutation is associated  
146 with epilepsy, it does not make cortical neuronal circuits more excitable at baseline.

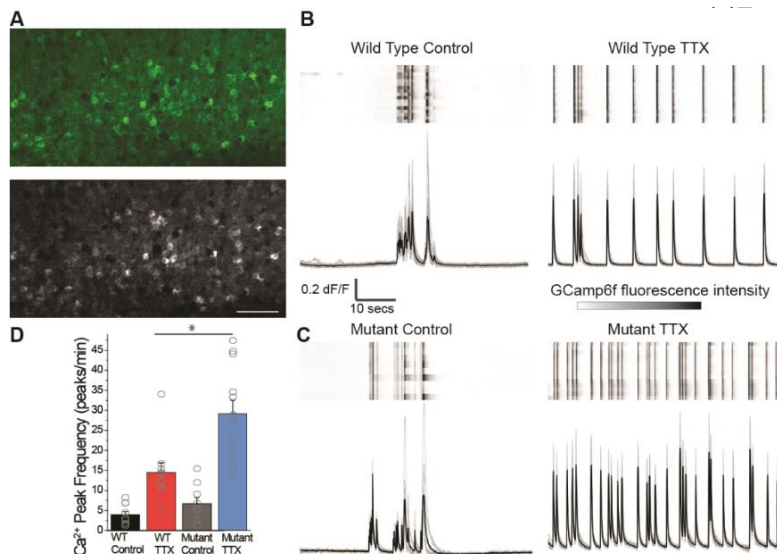

**Figure 2. Calcium imaging reveals exaggerated response to activity deprivation in *Hlf*<sup>-/-</sup>/*Dbp*<sup>-/-</sup>/*Tef*<sup>-/-</sup> triple knockout (TKO) slices. (A)** A confocal image of GCaMP6f fluorescence during an up state in wild type (WT) control slice (top panel) and a standard deviation projection of the same field of view of calcium signal during one minute of recording (bottom panel). Scale bar = 50µm. ROIs were manually selected around active cells identified by high standard deviation values. **(B,C)** GCaMP6f fluorescence heat map of selected ROIs (rows) during one minute of recording (top panels) also shown as overlapping traces (gray, bottom panels) and an average fluorescence (black trace, bottom panels) during one minute of recording in WT **(B)** and TKO (mutant) slices **(C)** from control (left) and TTX-treated conditions (right). **(D)** Quantification of peak frequency in GCaMP6f fluorescence traces. TTX treatment significantly increases peak frequency in WT slices. The increase is more dramatic in the TKO slices. Two-way ANOVA with Bonferroni correction for multiple comparisons to test statistical significance between conditions \* p<0.001.

164  
165  
166  
167  
168

## 169 Recovery from activity deprivation is unperturbed in the mutant slices

170 Homeostatic plasticity is thought to provide flexibility to the network and thus most forms are  
171 reversed after reintroduction of activity (Desai et al., 2002; Hobbiss et al., 2018; Koch et al.,  
172 2010; Wallace and Bear, 2004). Reversal involves a homeostatic reduction of abnormally  
173 elevated activity. Even when this involves symmetric opposing changes in the same biophysical  
174 parameters altered in the response to activity deprivation (such as with downscaling and  
175 upscaling of excitatory quantal amplitudes), the mechanisms involved typically differ (Stellwagen  
176 and Malenka, 2006; Sun and Turrigiano, 2011; Tan et al., 2015; Wang et al., 2017). To test  
177 whether the transcriptional restraint of homeostasis is required for such flexibility we asked  
178 whether the network is able to return back to baseline activity levels when the activity block is  
179 removed. We measured network activity right after silencing with TTX as well as following two  
180 days of incubation in the TTX-free media. In WT slices, activity deprivation causes hyperactivity  
181 evident from a two-fold rise in the peak frequency of the calcium activity. This exuberant activity  
182 is restored back to baseline levels within two days following restoration of action potential firing.  
183 In the mutant, even though the initial response to TTX is exaggerated, the network is also able  
184 to return to baseline levels following two days of recovery, indistinguishable from WT (Figure 2  
185 Supplement 1). These data suggest that the recovery from a high activity state is not diminished  
186 in the mutant.

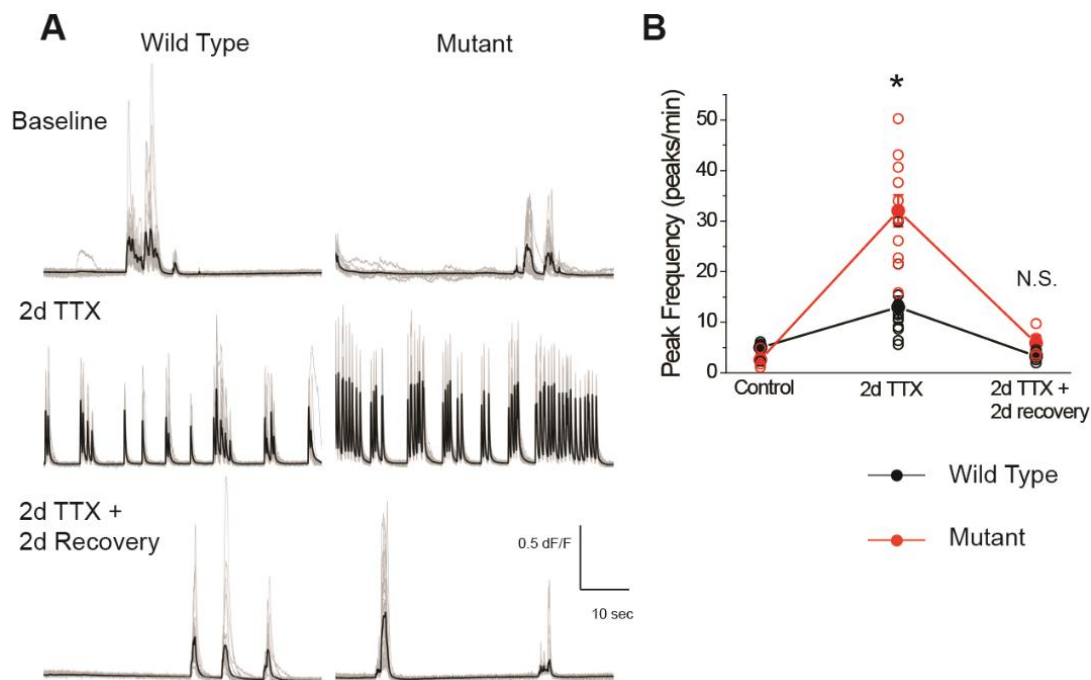

200 **Figure 2, Supplemental 1. Ca<sup>2+</sup> activity recovers to baseline levels following washout of TTX in**  
201 **both wild type and mutant slices. (A)** Representative GCaMP6f fluorescence intensity over 1 minute of  
202 recording in WT (left panels) and TKO slices (right panels) during control (top row), immediately after TTX  
203 washout (middle row) and after two days of recovery following TTX washout (bottom row). **(B)**  
204 Quantification of peak frequency in each of the conditions in **(A)**. Open symbols are individual slice  
205 cultures, filled symbols are mean  $\pm$  SEM. Although TTX incubation has a much stronger effect on  
206 spontaneous Ca<sup>2+</sup> activity immediately after washout in mutant slices, the activity returns back to  
207 baseline in both genotypes. Two-way ANOVA followed by Bonferroni correction for multiple comparisons  
208 to test the difference between individual groups. \*  $p < 0.05$ , N.S.  $p > 0.05$ .

209 **Frequency, but not amplitude, of mEPSCs is disproportionately upregulated by**  
 210 **deprivation in TKO slices**

211 Network activity is unaltered in the mutant at baseline but the response to activity deprivation is  
 212 exaggerated. To learn more about the mechanism by which *Hlf* and *Tef* restrain homeostatic  
 213 plasticity, we probed the effects of TTX on excitatory synaptic transmission. Because of the high  
 214 levels of spontaneous network activity, it was not feasible to study unitary action potential  
 215 evoked transmission. Instead, to broadly assay the properties of excitatory synapses, we  
 216 measured pharmacologically isolated miniature EPSCs in control and TTX-treated slices. We  
 217 observed a robust upregulation of mEPSC amplitude following two days of activity deprivation,  
 218 consistent with our understanding of homeostatic synaptic scaling (Turrigiano et al., 1998). We  
 219 also observed a large increase in mEPSC frequency, which has also been described in this  
 220 preparation (Koch et al., 2010) and in multiple other preparations (Wierenga et al., 2006). In the  
 221 TKO mice, the synaptic scaling is unaffected (Figure 3 A,C) but the increase in mEPSC  
 222 frequency in response to activity deprivation is more dramatic (Figure 3 B,D). Notably both the  
 223 frequency and amplitude of mEPSCs are the same between WT and mutant slices at baseline  
 224 which parallels our observations of network activity (Figure 2). These results suggest that the  
 225 members of the PAR bZIP family of TFs function to restrain upregulation of mEPSC frequency  
 226 in response to activity deprivation and this increase is correlated with changes in activity levels  
 227 across the network.

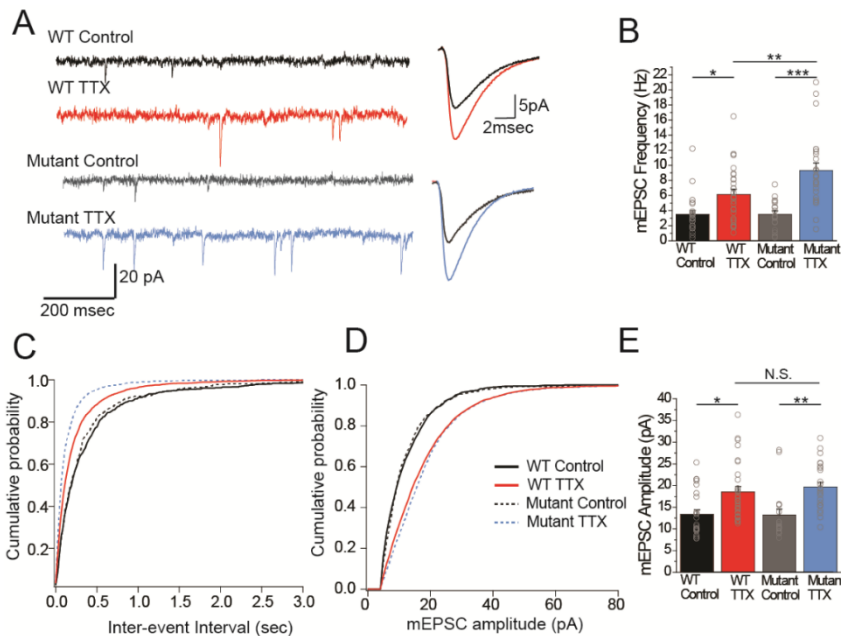

**Figure 3. Frequency but not amplitude of excitatory synaptic currents is disproportionately upregulated in TTX-treated TKO slices.** (A) Representative traces of mEPSC recordings from WT control (black), WT TTX-treated (red), TKO control (gray), and TKO TTX-treated (blue) slices. Right panel, average mEPSC waveforms for the same conditions. Both the frequency and the amplitude is increased in TTX-treated slices, however, the increase in frequency is more dramatic in TKO slices. (B) Quantification of mEPSC frequency for each condition. Colored bars with error bars are mean  $\pm$  SEM, open circles are

247

248 individual cells. (C) Cumulative probability histogram for mEPSC inter-event intervals in each condition.  
 249 (D) Cumulative probability histogram for mEPSC amplitudes in each condition. (E) mEPSC amplitudes for  
 250 each condition. \*adj.  $p < 0.05$ , \*\*adj.  $p < 0.01$ , \*\*\*adj.  $p < 0.001$ , N.S. – not significant, adj.  $p > 0.05$ , two-  
 251 way ANOVA with Tukey post hoc test.

252 **Neither the frequency nor amplitude of mIPSCs in pyramidal neurons in the TTX**  
 253 **condition are affected in the TKO.**

254 Since L5 pyramidal neurons also receive inhibitory input, which is also subject to homeostatic  
 255 plasticity (Kilman et al., 2002; Kim and Alger, 2010), we wanted to determine whether the

256 response of mIPSCs to activity deprivation is also exaggerated in the mutant mice. In wild-type  
 257 cultures, measurement of inhibitory input onto L5 pyramidal neurons revealed that both the  
 258 amplitude and frequency of mIPSCs drop in response to activity deprivation (Figure 4). When  
 259 we measured mIPSCs in pyramidal neurons from TKO slices, we saw a similar decrease in  
 260 frequency following 48 hr TTX treatment, although the amplitude of the change was smaller  
 261 than in the WT (Figure 4 B,C). In contrast, the mIPSC amplitude change is abolished: mIPSC  
 262 amplitude is decreased at baseline compared to WT but did not show a further decrease after  
 263 TTX treatment (Figure 4 D,E). However, the decreased amplitude in the untreated condition  
 264 does not correlate with the unchanged baseline network activity levels (Figure 2), suggesting  
 265 that the decrease of mIPSCs amplitude at baseline may be insufficient on its own to cause  
 266 network hyperexcitability. Thus, both the amplitude and frequency of mIPSCs received by  
 267 pyramidal neurons after activity deprivation are indistinguishable from the wild-type in the TKO  
 268 slices, suggesting that homeostatic plasticity of mIPSCs is not driving the changes in the  
 269 network activity following TTX treatment.

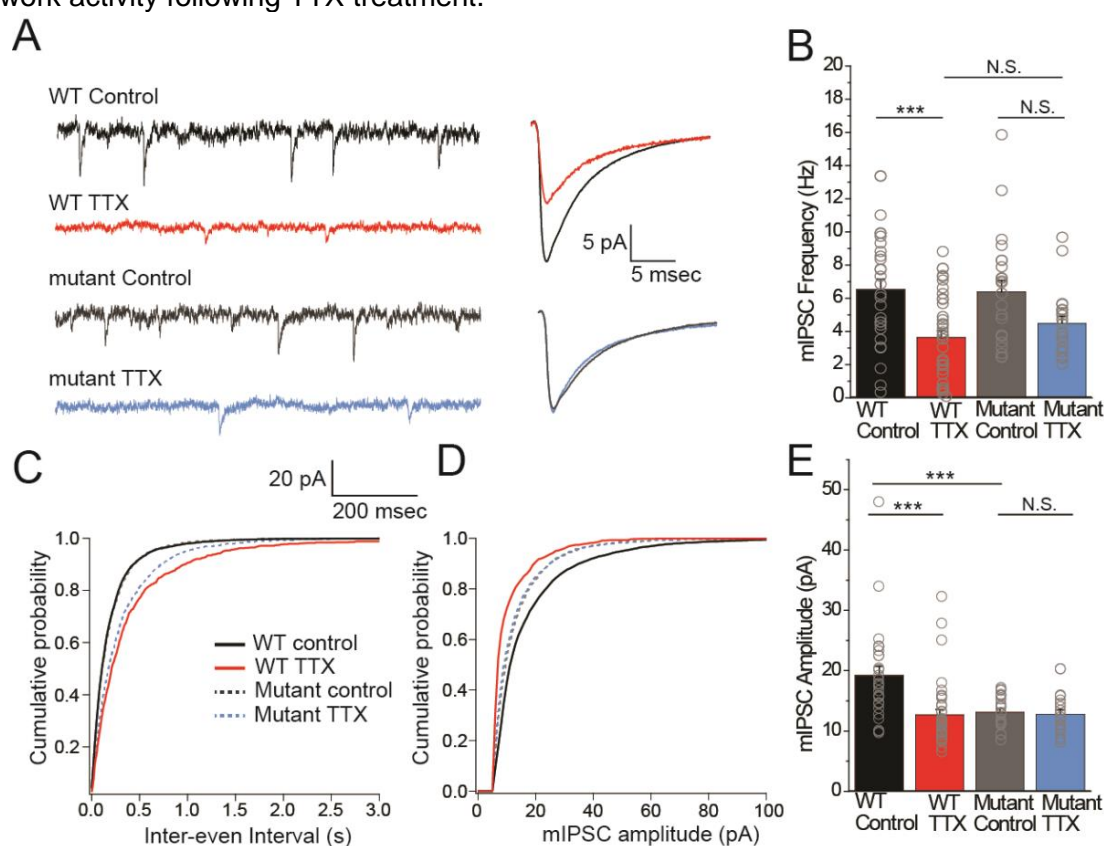

270 **Figure 4. Inhibitory synaptic currents are not affected by the *Hlf*<sup>-/-</sup>/*Dbp1*<sup>-/-</sup>/*Tef*<sup>-/-</sup> mutation in the TTX**  
 271 **condition. (A)** Representative traces of mIPSC recordings from WT control (black), WT TTX-treated  
 272 (red), TKO control (gray), and TKO TTX-treated (blue) slices. Right panel, average mIPSC waveforms for  
 273 the same conditions. TTX treatment results in a diminished effect on mIPSC frequency in TKO (adj.  $p =$   
 274  $0.14$ ) and does not further decrease the amplitude of mIPSCs in TKO slices. **(B)** Quantification of mIPSC  
 275 frequency. Colored bars with error bars are mean  $\pm$  SEM, open circles are individual cells. In **B** and **E**,  
 276 \*\*\*adj.  $p < 0.001$ , N.S. – not significant, adj.  $p > 0.05$  two-way ANOVA with Tukey post hoc test to  
 277 compare between individual conditions. **(C)** Cumulative probability histogram for mIPSC inter-event  
 278 intervals in each condition. **(D)** Cumulative probability histogram for mIPSC amplitudes in each condition.  
 279 **(E)** Quantification of mIPSC amplitudes.



## 280 Intrinsic excitability of pyramidal neurons is unaffected in TKO slices.

281 Changes in neuronal excitability have also been described as part of the homeostatic response  
282 to activity deprivation (Desai et al., 1999; Karmarkar and Buonomano, 2006; Lambo and  
283 Turrigiano, 2013; Moore et al., 2018; Yoshimura and Rasband, 2014). We wanted to test  
284 whether changes in intrinsic excitability could be contributing to the exaggerated homeostatic  
285 response in the TKO slices similarly to mEPSCs. WT L5 pyramidal neurons become more  
286 excitable following prolonged activity deprivation (Figure 5; Desai et al., 1999). To account for  
287 difference in the proportion of adapting and non-adapting neurons (Hattox and Nelson, 2007)  
288 causing apparent changes in intrinsic excitability due to uneven sampling of the two groups, we  
289 measured the adaptation ratio of each cell and analyzed an equal number of adapting and non-  
290 adapting cells in each genotype. Changes in excitability due to activity deprivation are  
291 accompanied by a shift in the average adaptation ratio of the cells in both WT and TKO slices  
292 (control WT:  $3.8 \pm 0.16$ , TTX WT:  $0.72 \pm 0.22$ , TKO control:  $0.46 \pm 0.25$ , TKO TTX:  $0.71 \pm 0.33$ , two-  
293 way ANOVA significant difference between control and TTX and no significant difference  
294 between WT and TKO). Excitatory neurons in L5 in the slices prepared from TKO animals are  
295 equally excitable at baseline and also show upregulation of intrinsic excitability to the same  
296 extent (Figure 5). These results suggest that changes in intrinsic excitability are not driving the  
297 exaggerated network response to activity deprivation and this form of homeostatic plasticity is  
298 not under the control of the Par bZIP TF family.

299

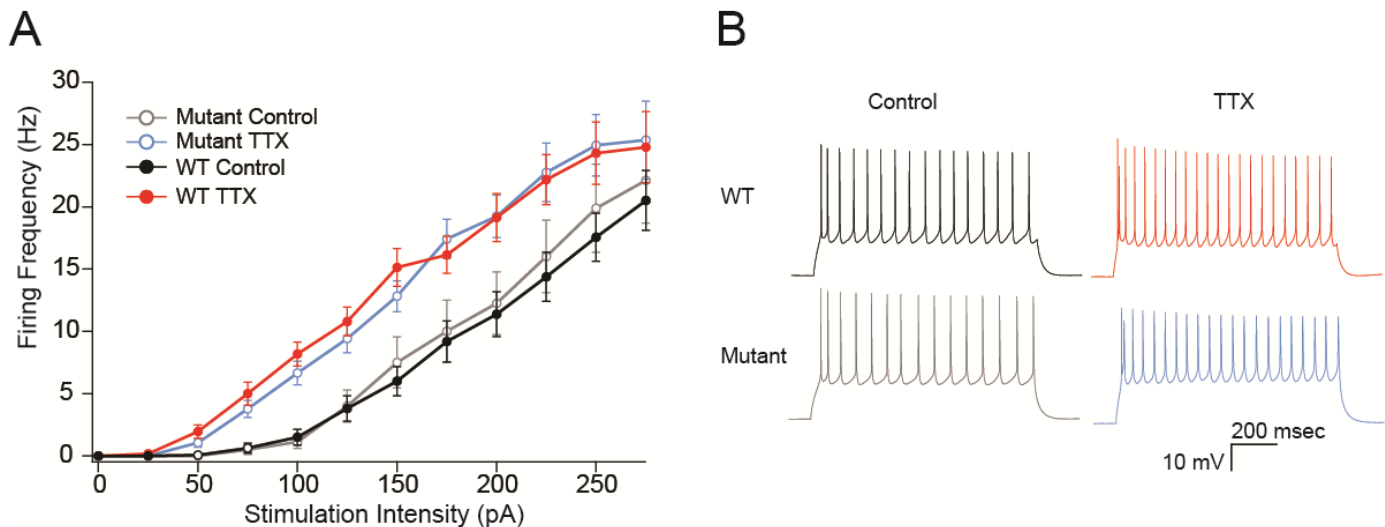

300

301

### 302 Figure 5. The effects of TTX on intrinsic excitability are not altered in TKO pyramidal neurons. (A)

303 Comparisons of frequency-current relationships for layer 5 pyramidal neurons in control (black, closed  
304 circles) and TTX-treated (red, closed circles) WT slices, and in control (gray, open circles), and TTX-  
305 treated (blue, open circles) TKO slices. Two-day TTX treatment increases intrinsic excitability ( $F(1,60) =$   
306  $18$ ,  $p < 0.001$ ) in both WT and TKO slice cultures to the same extent ( $F(1,60) = 0.006$ ,  $p = 0.94$ , 3-way  
307 ANOVA). (B) Example traces of a train of action potentials from a pyramidal neuron in response to a  
308 175 pA 0.5 s depolarizing current injection in control (left), TTX-treated (right), wild type (top), or TKO  
309 (bottom) slices.

### 310 PAR bZIP family members play unequal roles in restraining homeostatic plasticity

311 Expression of both *Hlf* and *Tef* increase in excitatory neurons following activity deprivation.  
312 Because all three Par bZIP family members form homo- and heterodimers and bind to the same  
313 PAR-response element (Gachon, 2007), they may be able to compensate for one another. To  
314 test whether both *Hlf*, *Tef*, and *Dbp* work together to regulate homeostatic plasticity or if they  
315 have unequal contributions to restraining network response to activity deprivation, we measured  
316 the homeostatic response while varying gene copy number of each transcription factor. None of  
317 the genotypes differed in their network activity at baseline (Figure 6, top panel). However, slices  
318 lacking both *Hlf* and *Tef* but that had either one or both copies of *Dbp* had an exaggerated  
319 response to 48hr of activity deprivation indistinguishable from the TKO mice (Figure 6). These  
320 data further demonstrate that *Dbp* is playing a limited role in the cortex and is unable to  
321 functionally compensate for the lack of the other two family members. On the other hand,  
322 deprived slices from mice lacking both copies of *Hlf* and *Dbp* and having just one intact copy of  
323 *Tef* had network activity within WT levels (Figure 6). Thus, a single copy of *Tef* was sufficient to  
324 maintain the normal degree of constraint of the homeostatic response. The response to TTX in  
325 animals lacking *Tef* and *Dbp* with only a single *Hlf* allele is intermediate (Figure 6). These data  
326 suggest that a single copy of *Tef* can functionally compensate for the lack of other family  
327 members in regulating homeostatic plasticity but even two copies of *Dbp* cannot.

328

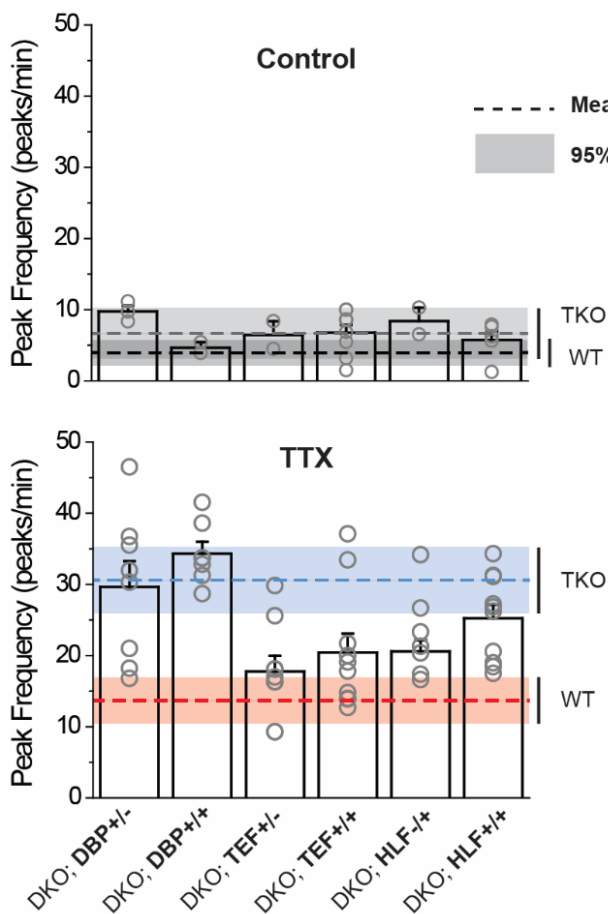

**Figure 6. A single copy of *Hlf* or *Tef* is sufficient to maintain normal control of homeostatic plasticity in mutant mice.**

Quantification of network activity measured by the number of peaks/minute of GCamp6f fluorescence. Under control conditions (top panel), all genotypes had similar levels of activity (4.7-9.7 peaks/min) and WT and mutant 95% confidence intervals were overlapping. However, the effects of TTX (bottom panel) differed by genotype. Slices from animals with one or both copies of *Dbp* (first two columns) have activity that are not statistically different from those from TKO animals (blue dotted line) (adj.p = 0.99 and 0.99 respectively, two-way ANOVA with Tukey test for multiple comparisons). However slices from animals with either one or both copies of *Tef* (two middle columns) are significantly different from TTX-treated TKO (adj.p = 0.0015 for *Tef* heterozygous and adj.p = 0.027 for *Tef* WT) and were not significantly different from wild-type TTX-treated slices (adj. p = 0.98 and 0.526 respectively). A single copy of *Hlf* was not significantly different from WT (adj p = 0.79) but both copies were (adj. p = 0.0058). TTX slices with one or both copies of *Hlf* were not significantly different from TKO TTX-treated slices (adj. p = 0.18 and 0.85 respectively).

356

357 To further dissect the relative contribution of the Par bZIP family members we measured the  
358 survival of the mice with different numbers of copies of the TFs. TKO animals develop  
359 spontaneous seizures and have a dramatically decreased lifespan (Gachon et al., 2004). While  
360 our objective was not to make a detailed study of the seizure phenotype, we also observed, on  
361 multiple occasions, TKO animals that experienced spontaneous seizures, even though for most  
362 of cases, the instance of death was not directly observed. However, just one allele of either *Hlf*  
363 or *Tef* restores the lifespan of the animals to levels not statistically different from WT. Mice with  
364 one *Dbp* allele have improved survival compared to TKO animals but still die at a statistically  
365 significant higher rate than WT mice (Figure 7). These results differ from the cortical network  
366 activity response to activity deprivation in organotypic slices where the presence of *Dbp* had no  
367 effect on homeostatic plasticity constraint. These data suggest that even though *Dbp* is  
368 dispensable for restraining homeostatic plasticity in the cortex, it may play a role in preventing  
369 premature death by functioning elsewhere in the brain or peripheral tissue (Stewart et al., 2020)  
370 since these TF are expressed and play important roles there (Wahlestedt et al., 2017; Wang et  
371 al., 2010). However, a single allele of *Hlf* and *Tef* is enough to compensate for loss of the rest of  
372 the family members and restore survival to WT levels.

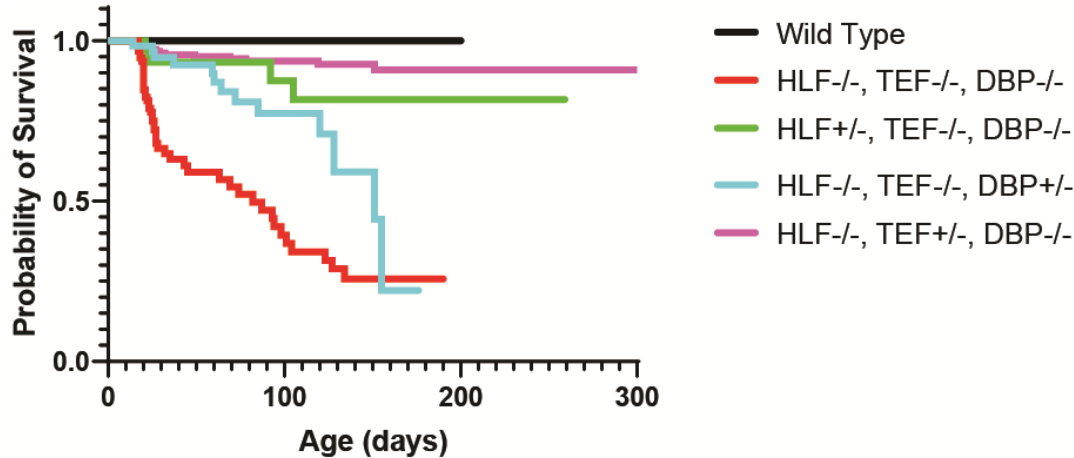

373

374 **Figure 7. Presence of one allele of a PARbZIP TF improves survival relative to TKO animals.** TKO  
375 mice have dramatically decreased survival (red line) compared to wild-type mice (black line). Presence of  
376 one copy of either *Hlf* (green line) or *Tef* (purple line) prevents premature death and the survival curves  
377 are not statistically different from wild-type,  $p = 0.118$  and  $p = 0.562$  respectively, Log-Rank test with  
378 Bonferroni correction for multiple comparisons. DBP heterozygous mice (blue line) also have improved  
379 survival over triple mutants ( $p = 0.003$ ) but are still statistically more likely to die prematurely than wild-  
380 type mice ( $p = 0.0003$ ).  
381

## 382 Discussion

383 Inappropriately triggered homeostatic plasticity can either fail to compensate for changes in  
384 activity or can itself destabilize network activity (Nelson and Valakh, 2015). Although some  
385 molecular pathways that are required for the induction of homeostatic plasticity have been  
386 identified, whether and how homeostatic plasticity is negatively regulated is unknown. Here we  
387 show that reduced activity, which initiates a compensatory increase in network excitability, also  
388 activates a set of transcription factors that function to restrain homeostasis. Thus we propose a  
389 model in which homeostatic plasticity is negatively regulated through the PAR bZIP family of  
390 TFs.

391 Excitatory neurons respond to a global drop in network activity by upregulating the frequency  
392 and amplitude of excitatory synaptic currents, decreasing inhibitory currents and increasing  
393 intrinsic excitability. These changes correlate with dramatically increased network activity  
394 immediately following removal of activity blockade that “overshoots” initial activity levels.  
395 Synaptic scaling of excitatory synapses has previously been shown to depend on intact  
396 transcription and translation (Dörrbaum et al., 2020; Goold and Nicoll, 2010; Ibata et al., 2008;  
397 Schanzenbächer et al., 2016). Here we demonstrate a second role for transcription in regulating  
398 the strength of the network homeostatic response. Loss of *Hlf*, *Tef*, and *Dbp* results in  
399 exaggerated homeostatic changes. However, the levels of network activity at baseline are  
400 unchanged. This suggests that these transcription factors are activated to restrain homeostatic  
401 signaling rather than downregulating network dynamics directly. While a few other genes have  
402 been described that have limited effects on network dynamics, but are required for homeostatic  
403 plasticity (Shank3 (Tatavarty et al., 2020), FMRP (Soden and Chen, 2010), Caspr2 (Fernandes  
404 et al., 2019)), this is, to our knowledge, the first negative regulator of homeostasis to be  
405 described.

406 Present data implicates mEPSC frequency, but not amplitude, as the site of the restraint of  
407 homeostatic plasticity. We cannot eliminate the contribution of inhibitory neurons as the  
408 contributing factor to homeostatic plasticity restraint since *Hlf* and *Tef* are expressed in this  
409 neuronal type. Interneuron function may also be regulated by *Hlf* and *Tef* and this role may  
410 predispose the network to seizures. Dissecting the contribution of different cell types during  
411 different developmental windows will require generation of a conditional knock out and selective  
412 cell-type specific disruption of individual transcription factors at different times in development.

413 mIPSCs received by the excitatory neurons cannot explain the exaggerated network  
414 hyperexcitability caused by TTX incubation in TKO slices since neither the amplitude nor  
415 frequency of mIPSCs is different in the TTX condition. We note, however, that the amplitude of  
416 mIPSCs is decreased at baseline in the untreated cultures. Such decrease of the strength of  
417 inhibitory currents is insufficient on its own to induce network excitability but may make the  
418 network more vulnerable to future insults.

419 It is tempting to imagine a direct relationship between the exaggerated homeostatic plasticity in  
420 TKO cortical slices and the increased seizures and spontaneous death of mutant animals. The  
421 lack of constraint of homeostatic response can potentially explain, at least in part, the seizure  
422 phenotype in animals lacking all three TFs. However, partial genetic compensation of DBP for  
423 the survival phenotype but not the homeostatic plasticity phenotype as assayed by calcium  
424 imaging, suggests that the propensity to develop seizures and diminished survival have a more  
425 complex origin involving other brain regions and perhaps other organs of the body.

426 Gachon et al. (Gachon et al., 2004) first reported that deletion of the PARbZIP proteins TEF,  
427 HLF and DBP caused spontaneous and audiogenic seizures. They suggested that this may  
428 reflect effects on neurotransmitter metabolism caused by a reduction in pyridoxal phosphate  
429 (PLP) since pyridoxal kinase, which catalyzes the last step in the conversion of vitamin B6 into  
430 PLP is a target of the PAR bZIP proteins. PLP is a required cofactor for decarboxylases and  
431 other enzymes involved in the synthesis and metabolism of GABA, glutamate and the biogenic  
432 amine neurotransmitters including dopamine, serotonin and histamine. Using HPLC they found  
433 no changes in GABA or glutamate, but reduced levels of dopamine, serotonin and histamine in  
434 the knockout animals. Although changes in amine transmitters could potentially contribute to  
435 phenotypes in vivo, they are unlikely to contribute to plasticity in cortical slice cultures which do

436 not include the brainstem nuclei from which these projections arise. Reduced glutamate  
437 decarboxylase action could potentially have contributed to the observed baseline reduction in  
438 mIPSCs since heterozygous (Lazarus et al., 2015) and homozygous (Lau and Murthy, 2012)  
439 mutants of *Gad1*, the gene encoding the GAD67 isoform of glutamic acid decarboxylase, have  
440 reduced mIPSC amplitudes. However, this does not account for the enhanced homeostatic  
441 overshoot following activity blockade, since in the TKO animals, activity blockade did not  
442 produce any further reduction in inhibition, but produced robust changes at excitatory synapses.

443 HLF and TEF form homo- or heterodimers and recognize similar DNA sequences (Gachon,  
444 2007). Here we demonstrate that these TFs can powerfully compensate for the loss of other  
445 family members. For instance, just one copy of *Tef* in the complete absence of *Hlf* and *Dbp* is  
446 sufficient to preserve the normal restraint of homeostatic plasticity, producing a response to  
447 activity deprivation that is indistinguishable from WT. Similarly, and in agreement with prior  
448 findings (Gachon et al., 2004), *Tef* and *Hlf* can robustly compensate for loss of each other and  
449 completely restore life span. Such robust compensation and functional redundancy of these TFs  
450 highlights their importance and may explain why they have not been identified in GWAS studies  
451 as risk factors for epilepsy or other neuropsychiatric diseases.

452 Besides their function in early embryonic development (Gavriouchkina et al., 2010; Wahlestedt  
453 et al., 2017), the PARb Zip TFs have been extensively studied for their roles in circadian  
454 rhythms in flies, zebrafish, and rodents (Cyran et al., 2003; Vatine et al., 2009; Weger et al.,  
455 2021). The present finding that HLF and TEF also act to restrain homeostatic plasticity is  
456 consistent with a recent report demonstrating that PAR bZIP TFs are differentially expressed in  
457 human epileptogenic tissue (Rambousek et al., 2020) In addition, CLOCK, an upstream  
458 regulator of these TFs, is necessary in cortical excitatory neurons for maintaining normal  
459 network activity and leads to epilepsy when conditionally deleted in these neurons (Li et al.,  
460 2017). Multiple components of the molecular clock are robustly expressed in the neocortex  
461 (Bering et al., 2018; Gachon et al., 2004; Kobayashi et al., 2015), consistent with the idea that  
462 they might have an additional function in the cortex that is distinct from their circadian role in  
463 SCN. However, the role of core clock genes in homeostatic plasticity has not yet been explored.  
464 In this work we expand the role of the PAR bZIP family of transcription factors to include the  
465 negative regulation of homeostatic plasticity.

466 Why should homeostatic plasticity be subject to such dual “push/pull” regulation? Perhaps  
467 because the changes in drive and excitability which must be buffered vary so widely during  
468 development. During the first few weeks of postnatal development in rodents, cortical neurons  
469 go from receiving few synapses to receiving thousands. This may require developmental  
470 downregulation of the strength of homeostatic plasticity. Neuropsychiatric diseases, such as  
471 monogenic causes of ASD, can trigger homeostatic changes in circuit properties which restore  
472 overall firing rates, but nonetheless have maladaptive effects on cortical function and flexibility  
473 (Antoine et al., 2019; Nelson and Valakh, 2015). Conversely, loss of function of genes giving  
474 rise to developmental disorders can cause failures of homeostatic plasticity (Blackman et al.,  
475 2012; Genç et al., 2020). Our findings provide a potential target for enhancing homeostatic  
476 plasticity in contexts where it is insufficient or for downregulating it when it is maladaptive, and  
477 provide an avenue to identify how the positive and negative regulators of homeostasis interact  
478 to stabilize network activity.

479

## 480 **Material and Methods**

### 481 ***Animals***

482 All procedures were approved by the Institutional Animal Care and Use Committee at Brandeis  
483 University, and conformed to the National Institutes of Health Guide for the Care and Use of  
484 Laboratory Animals. The initial RNAseq screen (Figure 1) was performed using the cre-  
485 dependent tdTomato reporter strain Ai9 (Madisen et al., 2010) crossed with either parvalbumin-  
486 ires-cre (Hippenmeyer et al., 2005) , or Emx1-ires-cre animals (Gorski et al., 2002) obtained  
487 from Jackson Labs. All other experiments were performed using wild-type (WT; C57BL/6J ) and  
488 previously published HLF, TEF, DBP triple mutant animals (Gachon et al., 2004) which were  
489 acquired from the European Mouse Mutant Archive (stock EM:02489) as frozen embryos and  
490 propagated via IVF using a provider-recommended protocol. *Hlf*, *Tef*, *Dbp* mutant mice were  
491 housed on a 12/12 light/dark cycle in a dedicated, climate-controlled facility. Cages were  
492 enriched with huts, chew sticks, and tubes. Food and water were available *ad libitum*, and  
493 animals were housed in groups of 2-4 after weaning at p21. Mice of both sexes were used for  
494 experiments.

### 495 ***Organotypic Slice Culture***

496 Organotypic slices were dissected from P6-8 pups. Animals were anaesthetized with a ketamine  
497 (20 mg/mL), xylazine (2.5 mg/mL) and acepromazine (0.5 mg/mL) mixture (40  $\mu$ L, via  
498 intraperitoneal injection), the brain was extracted, embedded in 2% agarose, and coronal slices  
499 containing primary somatosensory cortex were cut on a compresstome (Precisionary  
500 Instruments, Greenville, NC) to 300  $\mu$ m in ice-chilled ACSF (126 mM NaCl, 25 mM NaHCO<sub>3</sub>, 3  
501 mM KCl, 1 mM NaH<sub>2</sub>PO<sub>4</sub>, 25 mM dextrose, 2 mM CaCl<sub>2</sub> and 2 mM MgCl<sub>2</sub>, 315-319 mOsm) with  
502 a ceramic blade and placed directly onto 6-well Millipore Millicell cell culture inserts (Millipore  
503 Sigma PICM0RG50, Burlington, Massachusetts) over 1 mL warmed neuronal media (1x MEM  
504 (Millipore-Sigma), 1x GLUTAMAX (Gibco Thermo-Fisher Scientific) , 1 mM CaCl<sub>2</sub>, 2 mM  
505 MgSO<sub>4</sub>, 12.9 mM dextrose, 0.08% ascorbic acid, 18 mM NaHCO<sub>3</sub>, 35 mM 1M HEPES (pH 7.5),  
506 1  $\mu$ g/mL insulin and 20% Horse Serum (heat inactivated, Millipore-Sigma, Burlington,  
507 Massachusetts), pH 7.45 and 305 mOsm). Slices were placed in media containing 1x PenStrep  
508 (Gibco Thermo-Fisher Scientific) and 50  $\mu$ g/mL gentamicin (Millipore-Sigma for 24 hours and  
509 subsequent media changes were antibiotic-free. The slices were then grown at 35°C and 5%  
510 CO<sub>2</sub>. Media was changed every other day to 1 mL fresh media. For TTX treatment, media  
511 containing 500nM TTX was added during the media change at EP 12. For TTX washout  
512 experiments, two additional media changes with TTX-free media were performed 5 minutes  
513 apart.

514

### 515 ***RNA-sequencing***

516 *Cell sorting:* Slice cultures were converted into a single cell suspension as previously described  
517 (Sugino et al., 2006), with some modifications. Organotypic slice cultures were placed in ice  
518 cold, oxygenated ACSF with 1% FBS and 5% Trehalose (Saxena et al., 2012), that had been  
519 0.4  $\mu$ m filtered, containing blockers (APV, DNQX and TTX) to prevent excitotoxicity, and gently  
520 removed from the membrane. The cortex was micro-dissected under a Leica MZ 16-F  
521 fluorescent microscope and the tissue placed in an oxygenated room temperature bath for 45  
522 minutes, supplemented with 1 mg/ml type XIV protease (Sigma-Aldrich). Afterwards the tissue

523 was moved back to the ACSF solution (without protease) and triturated with fire polished  
524 Pasteur pipettes of successfully smaller diameters (~600, 300 and 150  $\mu$ m). Samples were then  
525 sorted with a BD FACSAria Flow Cytometer. All isolated material for mRNA sequencing was  
526 harvested using the picopure RNA isolation kit (Life Technologies) and subjected to an on  
527 column DNAase digestion. mRNA libraries were prepared as previously described (O'Toole et  
528 al., 2017): amplifying with the Ovation RNA-seq system (Nugen), sonicating with a Covaris S  
529 220 Shearing Device, constructing the libraries with the Ovation Rapid DR multiplex System  
530 (Nugen), and quantifying library concentration using the Illumina library quantification kit (KAPA  
531 biosystems). Samples were sequenced on either the Illumina Nextseq or Hiseq machines to a  
532 depth of ~25 million reads. Illumina sequencing adapters were trimmed from reads using  
533 cutadapt followed by mapping to the mm10 genome with STAR using the ENCODE Long RNA-  
534 Seq pipeline's parameters. Reads mapping to exons of known genes were quantified using  
535 featureCounts in the *Rsubread* package (Liao et al., 2019) and differential expression analysis  
536 was conducted using DESeq2 (Love et al., 2014). Adjusted p-values for each gene are reported  
537 from a Wald Test evaluating the significance of the coefficient representing the treatment group  
538 (TTX or Control) followed by the Benjamini-Hochberg correction.

539

#### 540 **Quantitative real-time PCR.**

541 RNA was extracted from neocortical regions of slice cultures using Trizol reagent followed by  
542 RNA Clean & Concentrator kit (Zymo research R1014). cDNA was synthesized with 0.5 $\mu$ g of  
543 RNA using the cDNA Synthesis Kit (Bio-Rad 170-8891) using random hexamers to generate  
544 cDNA from total RNA. Quantitative real-time PCR was performed using Corbett Research RG-  
545 6000 Real Time PCR Thermocycler with SYBR Green Supermix (Bio-Rad). The following primer  
546 sequences were used: RPL10 (forward) 5'-CACGGCAGAAACGAGACTTT-3', RPL10 (reverse)  
547 5'-CACGGACGATCCTATTGTCA-3', GAPDH (forward) 5'-TCAATGAAGGGGTCGTTGAT-3'  
548 GAPDH (reverse) 5'-CGTCCCGTAGACAAAATGGT-3', HLF (forward) 5'-  
549 CGGTCATGGATCTCAGCAG-3', HLF (reverse) 5'-GTACCTGGATGGTGTTCAGGG-3', TEF  
550 (forward) 5'-GAGCATTCTTTGCCTTGGTC-3', TEF (reverse) 5'-GGATGGTCTTGTCCCAGATG  
551 -3'.

552

#### 553 **Electrophysiology**

554 Organotypic slice cultures were cut out of the cell culture inserts along with the membrane using  
555 a scalpel blade. Slices were transferred to a thermo-regulated recording chamber and  
556 continuously perfused with oxygenated ACSF. Neurons were visualized on an Olympus upright  
557 epifluorescence microscope with 10x air and 40x water immersion objectives. Visually guided  
558 whole cell patch-clamp recordings were made using near-infrared differential interference  
559 contrast microscopy. Recording pipettes of 3–5 M $\Omega$  resistance contained internal solution with  
560 the following concentrations. For excitatory currents and intrinsic excitability: (in mM) 20 KCl,  
561 100 K-gluconate, 10 HEPES, 4 Mg-ATP, 0.3 Na-GTP, 10 Na-phosphocreatine, and 0.1%  
562 biocytin. For inhibitory currents: (in mM) 120 KCl, 10 HEPES, 4 Mg-ATP, 0.3 Na-GTP, 10 Na-  
563 phosphocreatine, and 0.1% biocytin. Recordings were collected using an AxoPatch 200B  
564 amplifier (Axon Instruments, Foster City, CA), filtered at 10 kHz and were not corrected for liquid

565 junction potentials. Data were collected on a Dell computer using custom software running on  
566 Igor Pro (WaveMetrics, Lake Oswego, OR).

### 567 *Intrinsic excitability*

568 Cells were selected at random from Layer 5 in primary somatosensory area of the cortex. Whole  
569 cell recordings were performed with a K-Gluconate-based internal recording solution. Synaptic  
570 currents were blocked by adding picrotoxin (PTX) at 25  $\mu$ M, 6,7-dinitroquinoxaline-2,3-dione  
571 (DNQX) 25  $\mu$ M, and (2R)-amino-5-phosphonovaleric acid (APV) at 35  $\mu$ M to standard ACSF to  
572 block  $\gamma$ -aminobutyric acid (GABA),  $\alpha$ -amino-3-hydroxy-5-methyl-4-isoxazolepropionic acid  
573 (AMPA), and N-methyl-d-aspartate (NMDA) receptors, respectively. Cells were held at -65mV  
574 by injecting a small current. 500 ms current injections ranging from -25 to 275 pA in 25pA steps  
575 increments at random intensity were delivered every 10 seconds. Adaptation ratio was  
576 calculated using custom-written IGOR script as previously described (Hattox and Nelson, 2007).  
577 Briefly, we calculated the ratio between the third and last inter-spike interval at two times the  
578 threshold current.

### 579 *Synaptic currents*

580 To isolated miniature excitatory AMPA-mediated currents 25 $\mu$ M PTX, 35 $\mu$ M APV and 500nM  
581 TTX were added to the extracellular recording solution. To isolate inhibitory currents, 20 $\mu$ M  
582 DNQX, 35 $\mu$ M APV and 500nM TTX were added to the extracellular solution. Cells were  
583 clamped at -65mV with a series resistance of below 20M $\Omega$  with no compensation for the liquid  
584 junction potential. 10 10-second traces were acquired for each cell. Miniature PSCs and action  
585 potentials were analyzed using custom-written IGOR scripts.

### 586 *Calcium imaging*

587 To visualize calcium dynamics, 24 hours after slice preparation, 1 $\mu$ L of  
588 pAAV.Syn.GCaMP6f.WPRE.SV40 (AAV9 capsid serotype, Addgene 100837) was applied to the  
589 somatosensory cortex in each hemisphere. At day EP14 slices were cut out along with the  
590 membrane and placed into the perfusion chamber mounted on a spinning disc microscope  
591 (Leica DMI 6000B (Leica Microsystems, Inc., Buffalo Grove, IL), with an Andor CSU W1  
592 spinning disc unit, using an Andor Neo sCMOS cameras and Andor IQ3 to run the system  
593 (Andor Technology PLC, Belfast, N. Ireland). Slices were allowed to acclimate while being  
594 perfused with 33 $^{\circ}$ C oxygenated ACSF with no TTX for 10 minutes. Slices were imaged with a  
595 10x objective centered over the primary somatosensory area. For each slice ten minutes of  
596 imaging from a 500 $\mu$ m square per slice were acquired at 33 frames per second.

### 597 *Calcium Imaging analysis*

598 Cellular somatic ROIs were selected by hand from background using custom MATLAB code  
599 (<http://github.com/VH-Lab/vhlab-TwoPhoton-matlab>) based on a standard deviation projection of  
600 the video (Figure 1A, bottom panel). Cells were only considered as viable if they: were of a  
601 characteristic size and shape for neurons; were bright enough to be clearly distinguished from  
602 background; were in focus with clear and sharp edges; and had several bouts of firing within the  
603 first minute. Only experiments where at least 15 such cells were analyzed were considered in  
604 further analysis. From these ROIs, mean intensity per cell at each frame was computed. The  
605 raw intensity value was transformed to  $\Delta F/F$  by finding baseline values where the coefficient of  
606 variation within 50 frames was below 0.3  $\Delta F/F$  units/frame. In cases where we failed to find any



607 periods where the coefficient of variation was low, the 5th percentile of all values defined the  
608 baseline. To produce a cellular firing frequency, noise was reduced by fitting the  $\Delta F/F$  data with  
609 a smoothing spline, then periods with a slope above 0.30  $\Delta F/F$  units/frame that were within 30  
610 frames of other frames with positive slope were recorded. The number of such periods reflected  
611 the number of times each cell was active during a minute, though this measure had no ability to  
612 predict the number of action potentials that made up each firing period.

613

614

## 615 **References**

- 616 Antoine, M.W., Langberg, T., Schnepel, P., and Feldman, D.E. (2019). Increased Excitation-  
617 Inhibition Ratio Stabilizes Synapse and Circuit Excitability in Four Autism Mouse Models.  
618 *Neuron* 101, 648-661.e4.
- 619 Bering, T., Carstensen, M.B., Wörtwein, G., Weikop, P., and Rath, M.F. (2018). The Circadian  
620 Oscillator of the Cerebral Cortex: Molecular, Biochemical and Behavioral Effects of Deleting the  
621 Arntl Clock Gene in Cortical Neurons. *Cereb. Cortex* 28, 644–657.
- 622 Blackman, M.P., Djukic, B., Nelson, S.B., and Turrigiano, G.G. (2012). A critical and cell-  
623 autonomous role for MeCP2 in synaptic scaling up. *J. Neurosci. Off. J. Soc. Neurosci.* 32,  
624 13529–13536.
- 625 Cyran, S.A., Buchsbaum, A.M., Reddy, K.L., Lin, M.-C., Glossop, N.R.J., Hardin, P.E., Young,  
626 M.W., Storti, R.V., and Blau, J. (2003). vrille, Pdp1, and dClock form a second feedback loop in  
627 the Drosophila circadian clock. *Cell* 112, 329–341.
- 628 Davis, G.W. (2006). Homeostatic control of neural activity: from phenomenology to molecular  
629 design. *Annu. Rev. Neurosci.* 29, 307–323.
- 630 Delvendahl, I., and Müller, M. (2019). Homeostatic plasticity-a presynaptic perspective. *Curr.*  
631 *Opin. Neurobiol.* 54, 155–162.
- 632 Desai, N.S., Rutherford, L.C., and Turrigiano, G.G. (1999). Plasticity in the intrinsic excitability of  
633 cortical pyramidal neurons. *Nat. Neurosci.* 2, 515–520.
- 634 Desai, N.S., Cudmore, R.H., Nelson, S.B., and Turrigiano, G.G. (2002). Critical periods for  
635 experience-dependent synaptic scaling in visual cortex. *Nat. Neurosci.* 5, 783–789.
- 636 Dörrbaum, A.R., Alvarez-Castelao, B., Nassim-Assir, B., Langer, J.D., and Schuman, E.M.  
637 (2020). Proteome dynamics during homeostatic scaling in cultured neurons. *ELife* 9, e52939.
- 638 Fernandes, D., Santos, S.D., Coutinho, E., Whitt, J.L., Beltrão, N., Rondão, T., Leite, M.I.,  
639 Buckley, C., Lee, H.-K., and Carvalho, A.L. (2019). Disrupted AMPA Receptor Function upon  
640 Genetic- or Antibody-Mediated Loss of Autism-Associated CASPR2. *Cereb. Cortex N. Y. NY* 29,  
641 4919–4931.
- 642 Gachon, F. (2007). Physiological function of PARbZip circadian clock-controlled transcription  
643 factors. *Ann. Med.* 39, 562–571.

- 644 Gachon, F., Fonjallaz, P., Damiola, F., Gos, P., Kodama, T., Zakany, J., Duboule, D., Petit, B.,  
645 Tafti, M., and Schibler, U. (2004). The loss of circadian PAR bZip transcription factors results in  
646 epilepsy. *Genes Dev.* *18*, 1397–1412.
- 647 Galvan, C.D., Hrachovy, R.A., Smith, K.L., and Swann, J.W. (2000). Blockade of Neuronal  
648 Activity During Hippocampal Development Produces a Chronic Focal Epilepsy in the Rat. *J.*  
649 *Neurosci.* *20*, 2904–2916.
- 650 Gavriouchkina, D., Fischer, S., Ivacevic, T., Stolte, J., Benes, V., and Dekens, M.P.S. (2010).  
651 Thyrotroph embryonic factor regulates light-induced transcription of repair genes in zebrafish  
652 embryonic cells. *PLoS One* *5*, e12542.
- 653 Genç, Ö., An, J.-Y., Fetter, R.D., Kulik, Y., Zunino, G., Sanders, S.J., and Davis, G.W. (2020).  
654 Homeostatic plasticity fails at the intersection of autism-gene mutations and a novel class of  
655 common genetic modifiers. *ELife* *9*, e55775.
- 656 Goold, C.P., and Nicoll, R.A. (2010). Single-cell optogenetic excitation drives homeostatic  
657 synaptic depression. *Neuron* *68*, 512–528.
- 658 Gorski, J.A., Talley, T., Qiu, M., Puelles, L., Rubenstein, J.L.R., and Jones, K.R. (2002). Cortical  
659 Excitatory Neurons and Glia, But Not GABAergic Neurons, Are Produced in the Emx1-  
660 Expressing Lineage. *J. Neurosci.* *22*, 6309–6314.
- 661 Hattox, A.M., and Nelson, S.B. (2007). Layer V Neurons in Mouse Cortex Projecting to Different  
662 Targets Have Distinct Physiological Properties. *J. Neurophysiol.* *98*, 3330–3340.
- 663 Hawkins, N.A., and Kearney, J.A. (2012). Confirmation of an epilepsy modifier locus on mouse  
664 chromosome 11 and candidate gene analysis by RNA-Seq. *Genes Brain Behav.* *11*, 452–460.
- 665 Hawkins, N.A., and Kearney, J.A. (2016). Hlf is a genetic modifier of epilepsy caused by  
666 voltage-gated sodium channel mutations. *Epilepsy Res.* *119*, 20–23.
- 667 Hippenmeyer, S., Vrieseling, E., Sigrist, M., Portmann, T., Laengle, C., Ladle, D.R., and Arber,  
668 S. (2005). A Developmental Switch in the Response of DRG Neurons to ETS Transcription  
669 Factor Signaling. *PLoS Biol.* *3*, e159.
- 670 Hobbiss, A.F., Ramiro-Cortés, Y., and Israely, I. (2018). Homeostatic Plasticity Scales Dendritic  
671 Spine Volumes and Changes the Threshold and Specificity of Hebbian Plasticity. *IScience* *8*,  
672 161–174.
- 673 Ibata, K., Sun, Q., and Turrigiano, G.G. (2008). Rapid Synaptic Scaling Induced by Changes in  
674 Postsynaptic Firing. *Neuron* *57*, 819–826.
- 675 Johnson, H.A., and Buonomano, D.V. (2007). Development and Plasticity of Spontaneous  
676 Activity and Up States in Cortical Organotypic Slices. *J. Neurosci.* *27*, 5915–5925.
- 677 Karmarkar, U.R., and Buonomano, D.V. (2006). Different forms of homeostatic plasticity are  
678 engaged with distinct temporal profiles. *Eur. J. Neurosci.* *23*, 1575–1584.
- 679 Kilman, V., Rossum, M.C.W. van, and Turrigiano, G.G. (2002). Activity Deprivation Reduces  
680 Miniature IPSC Amplitude by Decreasing the Number of Postsynaptic GABAA Receptors  
681 Clustered at Neocortical Synapses. *J. Neurosci.* *22*, 1328–1337.

- 682 Kim, J., and Alger, B.E. (2010). Reduction in endocannabinoid tone is a homeostatic  
683 mechanism for specific inhibitory synapses. *Nat. Neurosci.* *13*, 592–600.
- 684 Kobayashi, Y., Ye, Z., and Hensch, T.K. (2015). Clock genes control cortical critical period  
685 timing. *Neuron* *86*, 264–275.
- 686 Koch, H., Huh, S.-E., Elsen, F.P., Carroll, M.S., Hodge, R.D., Bedogni, F., Turner, M.S., Hevner,  
687 R.F., and Ramirez, J.-M. (2010). Prostaglandin E2-Induced Synaptic Plasticity in Neocortical  
688 Networks of Organotypic Slice Cultures. *J. Neurosci.* *30*, 11678–11687.
- 689 Lambo, M.E., and Turrigiano, G.G. (2013). Synaptic and Intrinsic Homeostatic Mechanisms  
690 Cooperate to Increase L2/3 Pyramidal Neuron Excitability during a Late Phase of Critical Period  
691 Plasticity. *J. Neurosci.* *33*, 8810–8819.
- 692 Lau, C.G., and Murthy, V.N. (2012). Activity-Dependent Regulation of Inhibition via GAD67. *J.*  
693 *Neurosci.* *32*, 8521–8531.
- 694 Lazarus, M.S., Krishnan, K., and Huang, Z.J. (2015). GAD67 deficiency in parvalbumin  
695 interneurons produces deficits in inhibitory transmission and network disinhibition in mouse  
696 prefrontal cortex. *Cereb. Cortex N. Y. N 1991* *25*, 1290–1296.
- 697 Li, P., Fu, X., Smith, N.A., Ziobro, J., Curiel, J., Tenga, M.J., Martin, B., Freedman, S., Cea-Del  
698 Rio, C.A., Oboti, L., et al. (2017). Loss of CLOCK Results in Dysfunction of Brain Circuits  
699 Underlying Focal Epilepsy. *Neuron* *96*, 387-401.e6.
- 700 Liao, Y., Smyth, G.K., and Shi, W. (2019). The R package Rsubread is easier, faster, cheaper  
701 and better for alignment and quantification of RNA sequencing reads. *Nucleic Acids Res.* *47*,  
702 e47.
- 703 Love, M.I., Huber, W., and Anders, S. (2014). Moderated estimation of fold change and  
704 dispersion for RNA-seq data with DESeq2. *Genome Biol.* *15*, 550.
- 705 Madisen, L., Zwingman, T.A., Sunkin, S.M., Oh, S.W., Zariwala, H.A., Gu, H., Ng, L.L., Palmiter,  
706 R.D., Hawrylycz, M.J., Jones, A.R., et al. (2010). A robust and high-throughput Cre reporting  
707 and characterization system for the whole mouse brain. *Nat. Neurosci.* *13*, 133–140.
- 708 Mitsui, S., Yamaguchi, S., Matsuo, T., Ishida, Y., and Okamura, H. (2001). Antagonistic role of  
709 E4BP4 and PAR proteins in the circadian oscillatory mechanism. *Genes Dev.* *15*, 995–1006.
- 710 Moore, A.R., Richards, S.E., Kenny, K., Royer, L., Chan, U., Flavahan, K., Van Hooser, S.D.,  
711 and Paradis, S. (2018). Rem2 stabilizes intrinsic excitability and spontaneous firing in visual  
712 circuits. *ELife* *7*, e33092.
- 713 Nelson, S.B., and Valakh, V. (2015). Excitatory/Inhibitory Balance and Circuit Homeostasis in  
714 Autism Spectrum Disorders. *Neuron* *87*, 684–698.
- 715 O’Toole, S.M., Ferrer, M.M., Mekonnen, J., Zhang, H., Shima, Y., Ladle, D.R., and Nelson, S.B.  
716 (2017). Dicer maintains the identity and function of proprioceptive sensory neurons. *J.*  
717 *Neurophysiol.* *117*, 1057–1069.
- 718 Rambousek, L., Gschwind, T., Lafourcade, C., Paterna, J.-C., Dib, L., Fritschy, J.-M., and  
719 Fontana, A. (2020). Aberrant expression of PAR bZIP transcription factors is associated with  
720 epileptogenesis, focus on hepatic leukemia factor. *Sci. Rep.* *10*, 1–16.

- 721 Ripperger, J.A., Shearman, L.P., Reppert, S.M., and Schibler, U. (2000). CLOCK, an essential  
722 pacemaker component, controls expression of the circadian transcription factor DBP. *Genes*  
723 *Dev.* 14, 679–689.
- 724 Sanchez-Vives, M.V., and McCormick, D.A. (2000). Cellular and network mechanisms of  
725 rhythmic recurrent activity in neocortex. *Nat. Neurosci.* 3, 1027–1034.
- 726 Saxena, A., Wagatsuma, A., Noro, Y., Kuji, T., Asaka-Oba, A., Watahiki, A., Gurnot, C.,  
727 Fagiolini, M., Hensch, T.K., and Carninci, P. (2012). Trehalose-enhanced isolation of neuronal  
728 sub-types from adult mouse brain. *BioTechniques* 52, 381–385.
- 729 Schanzenbächer, C.T., Sambandan, S., Langer, J.D., and Schuman, E.M. (2016). Nascent  
730 Proteome Remodeling following Homeostatic Scaling at Hippocampal Synapses. *Neuron* 92,  
731 358–371.
- 732 Scharfman, H. (2002). A Novel Animal Model of Epilepsy Caused by Inhibiting Neuronal Activity  
733 during Development. *Epilepsy Curr.* 2, 127–128.
- 734 Schaukowitch, K., Reese, A.L., Kim, S.-K., Kilaru, G., Joo, J.-Y., Kavalali, E.T., and Kim, T.-K.  
735 (2017). An Intrinsic Transcriptional Program Underlying Synaptic Scaling during Activity  
736 Suppression. *Cell Rep.* 18, 1512–1526.
- 737 Soden, M.E., and Chen, L. (2010). Fragile X Protein FMRP Is Required for Homeostatic  
738 Plasticity and Regulation of Synaptic Strength by Retinoic Acid. *J. Neurosci.* 30, 16910–16921.
- 739 Stellwagen, D., and Malenka, R.C. (2006). Synaptic scaling mediated by glial TNF- $\alpha$ . *Nature*  
740 440, 1054.
- 741 Stewart, M., Silverman, J.B., Sundaram, K., and Kollmar, R. (2020). Causes and Effects  
742 Contributing to Sudden Death in Epilepsy and the Rationale for Prevention and Intervention.  
743 *Front. Neurol.* 11, 765.
- 744 Sugino, K., Hempel, C.M., Miller, M.N., Hattox, A.M., Shapiro, P., Wu, C., Huang, Z.J., and  
745 Nelson, S.B. (2006). Molecular taxonomy of major neuronal classes in the adult mouse  
746 forebrain. *Nat. Neurosci.* 9, 99–107.
- 747 Sun, Q., and Turrigiano, G.G. (2011). PSD-95 and PSD-93 Play Critical But Distinct Roles in  
748 Synaptic Scaling Up and Down. *J. Neurosci.* 31, 6800–6808.
- 749 Tan, H.L., Queenan, B.N., and Huganir, R.L. (2015). GRIP1 is required for homeostatic  
750 regulation of AMPAR trafficking. *Proc. Natl. Acad. Sci.* 112, 10026–10031.
- 751 Tatavarty, V., Pacheco, A.T., Kuhnle, C.G., Lin, H., Koundinya, P., Miska, N.J., Hengen, K.B.,  
752 Wagner, F.F., Hooser, S.D.V., and Turrigiano, G.G. (2020). Autism-associated Shank3 is  
753 essential for homeostatic compensation in rodent V1. *Neuron* 106, 769-777.e4.
- 754 Turrigiano, G.G., and Nelson, S.B. (2004). Homeostatic plasticity in the developing nervous  
755 system. *Nat. Rev. Neurosci.* 5, 97.
- 756 Turrigiano, G.G., Leslie, K.R., Desai, N.S., Rutherford, L.C., and Nelson, S.B. (1998). Activity-  
757 dependent scaling of quantal amplitude in neocortical neurons. *Nature* 391, 892–896.

- 758 Vatine, G., Vallone, D., Appelbaum, L., Mracek, P., Ben-Moshe, Z., Lahiri, K., Gothilf, Y., and  
759 Foulkes, N.S. (2009). Light Directs Zebrafish period2 Expression via Conserved D and E Boxes.  
760 PLoS Biol. 7, e1000223.
- 761 Wahlestedt, M., Ladopoulos, V., Hidalgo, I., Sanchez Castillo, M., Hannah, R., Säwén, P., Wan,  
762 H., Dudenhöffer-Pfeifer, M., Magnusson, M., Norddahl, G.L., et al. (2017). Critical Modulation of  
763 Hematopoietic Lineage Fate by Hepatic Leukemia Factor. Cell Rep. 21, 2251–2263.
- 764 Wallace, W., and Bear, M.F. (2004). A Morphological Correlate of Synaptic Scaling in Visual  
765 Cortex. J. Neurosci. 24, 6928–6938.
- 766 Wang, Q., Maillard, M., Schibler, U., Burnier, M., and Gachon, F. (2010). Cardiac hypertrophy,  
767 low blood pressure, and low aldosterone levels in mice devoid of the three circadian PAR bZip  
768 transcription factors DBP, HLF, and TEF. Am. J. Physiol.-Regul. Integr. Comp. Physiol. 299,  
769 R1013–R1019.
- 770 Wang, Q., Chiu, S.-L., Koropouli, E., Hong, I., Mitchell, S., Easwaran, T.P., Hamilton, N.R.,  
771 Gustina, A.S., Zhu, Q., Ginty, D.D., et al. (2017). Neuropilin-2/PlexinA3 Receptors Associate  
772 with GluA1 and Mediate Sema3F-Dependent Homeostatic Scaling in Cortical Neurons. Neuron  
773 96, 1084-1098.e7.
- 774 Weger, B.D., Gobet, C., David, F.P.A., Atger, F., Martin, E., Phillips, N.E., Charpagne, A.,  
775 Weger, M., Naef, F., and Gachon, F. (2021). Systematic analysis of differential rhythmic liver  
776 gene expression mediated by the circadian clock and feeding rhythms. Proc. Natl. Acad. Sci. U.  
777 S. A. 118, e2015803118.
- 778 Wierenga, C.J., Walsh, M.F., and Turrigiano, G.G. (2006). Temporal Regulation of the  
779 Expression Locus of Homeostatic Plasticity. J. Neurophysiol. 96, 2127–2133.
- 780 Yoshimura, T., and Rasband, M.N. (2014). Axon initial segments: diverse and dynamic neuronal  
781 compartments. Curr. Opin. Neurobiol. 27, 96–102.
- 782
