# Supplementary material for: A transcriptional constraint mechanism limits the homeostatic response to activity deprivation in mammalian neocortex
Source: bioRxiv preprint, doi:10.1101/2021.10.20.465163, version 2 (2023-01-09)
Supplement: Data for Figure 2 [file 465163_file04.xlsx]

## Sheet: P14
Data Name	User	Condition	synchrony	peak freq (Hz)	peak freq	selected cells		#alleles HLF	#allelesTEF	#alleles DBP
11-10-17 WC CTRL B	Aelita	P14 WC CTRL	0.888697	0.0531481	3.18889	27		2	2	2
5-26-18 WC CTRL A	Aelita	P14 WC CTRL	0.473632	0.0205	1.23	10		2	2	2
6-7-18 EMCR CTRL A	Aelita	P14 WC CTRL	0.773072	0.0509804	3.05882	17		2	2	2
2-11-22 WC05 WT1 A	Mingqi	P14 WC CTRL	0.726411	0.053	3.18	30		2	2	2
2-11-22 WC05 WT2 A	Mingqi	P14 WC CTRL	0.725588	0.0289506	1.73704	27		2	2	2
2-15-22 WC10 WT2 B	Mingqi	P14 WC CTRL	0.871684	0.0400694	2.40417	24		2	2	2
2-15-22 WC10 WT3 A	Mingqi	P14 WC CTRL	0.787591	0.0275144	1.65086	29		2	2	2
3-27-22 WC05 WT1 A	Mingqi	P14 WC CTRL	0.541375	0.0547619	3.28571	14		2	2	2
3-27-22 WC05 WT1 B	Mingqi	P14 WC CTRL	0.646124	0.0608046	3.64828	29		2	2	2
3-27-22 WC05 WT1 D	Mingqi	P14 WC CTRL	0.743096	0.117807	7.06842	19		2	2	2
4-1-22 WC10 WT1 A	Mingqi	P14 WC CTRL	0.931489	0.0990476	5.94286	28		2	2	2
4-1-22 WC10 WT1 B	Mingqi	P14 WC CTRL	0.897876	0.140039	8.40233	43		2	2	2
4-1-22 WC10 WT2 A	Mingqi	P14 WC CTRL	0.898583	0.062027	3.72162	37		2	2	2
4-1-22 WC10 WT3 A	Mingqi	P14 WC CTRL	0.59645	0.0519577	3.11746	35		2	2	2
4-1-22 WC10 WT3 B	Mingqi	P14 WC CTRL	0.726708	0.04	2.4	20		2	2	2
4-1-22 WC10 WT3 C	Mingqi	P14 WC CTRL	0.865587	0.0461979	2.77188	32		2	2	2
		Average	0.755873	0.0591753	3.55052
		StErr	0.0342597	0.00819126	0.491476
		StDev	0.137039	0.032765	1.9659
Data Name	User	Condition	synchrony	peak freq (Hz)	peak freq
11-10-17 HLF 350 CTRL B	Aelita	P14 TKO CTRL	0.777704	0.055	3.3	14		0	0	0
10-2-17 HLF 302 CTRL B	Aelita	P14 TKO CTRL	0.70915	0.0490698	2.94419	43		0	0	0
3-5-18 HLF 613 CTRL B	Aelita	P14 TKO CTRL	0.863484	0.185714	11.1429	14		0	0	0
6-28-18 HLF 870 CTRL A	Aelita	P14 TKO CTRL	0.746248	0.161786	9.70714	28		0	0	0
7-17-18 HLF 919 CTRL A	Aelita	P14 TKO CTRL	0.656346	0.0932407	5.59444	18		0	0	0
5-1-22 TKO CTRL B	Mingqi	P14 TKO CTRL	0.86073	0.0567742	3.40645	31		0	0	0
6-10-22 TKO ANIMAL 8 CTRL A	Jaidyn	P14 TKO CTRL	0.651863	0.045	2.7	12		0	0	0
7-24-22 TKO CTRL A	Jaidyn	P14 TKO CTRL	0.68285	0.0442063	2.65238	21		0	0	0
		Average	0.743547	0.0863489	5.18093
		StErr	0.0299308	0.0199752	1.19851
		StDev	0.0846572	0.0564985	3.38991
Data Name	User	Condition	synchrony	peak freq (Hz)	peak freq
11-10-17 WC TTX A	Aelita	P14 WC 2D TTX	0.960699	0.181222	10.8733	30		2	2	2
11-10-17 WC TTX B	Aelita	P14 WC 2D TTX	0.938738	0.241075	14.4645	31		2	2	2
10-2-17 WC TTX A	Aelita	P14 WC 2D TTX	0.982446	0.236049	14.163	15		2	2	2
2-18-18 WC TTX A	Aelita	P14 WC 2D TTX	0.931276	0.566954	34.0172	29		2	2	2
2-18-18 WC TTX B	Aelita	P14 WC 2D TTX	0.938292	0.277681	16.6609	23		2	2	2
3-5-18 WC TTX B	Aelita	P14 WC 2D TTX	0.992762	0.0833333	5	20		2	2	2
4-18-18 WC TTX A	Aelita	P14 WC 2D TTX	0.980802	0.206825	12.4095	21		2	2	2
6-7-18 EMCR TTX A	Aelita	P14 WC 2D TTX	0.983047	0.256823	15.4094	32		2	2	2
6-7-18 EMCR TTX B	Aelita	P14 WC 2D TTX	0.967239	0.113478	6.8087	23		2	2	2
6-27-18 WC TTX B	Aelita	P14 WC 2D TTX	0.917318	0.106344	6.38065	31		2	2	2
6-28-18 CD1 TTX B	Aelita	P14 WC 2D TTX	0.942911	0.179389	10.7633	30		2	2	2
7-17-18 WC TTX A	Aelita	P14 WC 2D TTX	0.85014	0.17601	10.5606	33		2	2	2
4-18-18 WC TTX B	Aelita	P14 WC 2D TTX	0.958185	0.199951	11.9971	34		2	2	2
		Average	0.948806	0.218765	13.1259
		StErr	0.0113557	0.0363013	2.17808
		StDev	0.0393373	0.125751	7.54508
Data Name	User	Condition	synchrony	peak freq (Hz)	peak freq
11-10-17 HLF 350 TTX A	Aelita	P14 TKO 2D TTX	0.931875	0.574611	34.4767	30		0	0	0
11-10-17 HLF 350 TTX B	Aelita	P14 TKO 2D TTX	0.971375	0.454	27.24	30		0	0	0
11-10-17 HLF 350 TTX C	Aelita	P14 TKO 2D TTX	0.990164	0.741389	44.4833	30		0	0	0
11-10-17 HLF 350 TTX D	Aelita	P14 TKO 2D TTX	0.829582	0.344892	20.6935	31		0	0	0
3-5-18 HLF 613 TTX B	Aelita	P14 TKO 2D TTX	0.980914	0.505256	30.3154	13		0	0	0
2-16-18 HLF 562 TTX B	Aelita	P14 TKO 2D TTX	0.979147	0.357778	21.4667	30		0	0	0
2-8-18 HLF 533 TTX A	Aelita	P14 TKO 2D TTX	0.97204	0.718333	43.1	30		0	0	0
2-8-18 HLF 534 TTX B	Aelita	P14 TKO 2D TTX	0.934533	0.436257	26.1754	19		0	0	0
6-28-18 HLF 870 TTX A	Aelita	P14 TKO 2D TTX	0.954596	0.583111	34.9867	30		0	0	0
6-28-18 HLF 870 TTX B	Aelita	P14 TKO 2D TTX	0.891177	0.284626	17.0776	35		0	0	0
7-10-18 HLF 897 TTX A	Aelita	P14 TKO 2D TTX	0.983827	0.627135	37.6281	32		0	0	0
		Average	0.947203	0.511581	30.6949
		StErr	0.0147613	0.0457243	2.74346
		StDev	0.0489579	0.15165	9.09903
						48
																															2-way ANOVA-peak								Tukey’s honestly significant difference procedure
																															'Source'	'Sum Sq.'	'd.f.'	'Singular?'	'Mean Sq.'	'F'	'Prob>F'		Group A	Group B	Lower Limit	A-B	Upper Limit	P-value
																														genotype	'X1'	1046.79	1	0	1046.79	28.9	2.76206e-06		WC CTRL	TKO CTRL	-8.58855	-1.63041	5.32772	0.923288
																														drug	'X2'	3447.97	1	0	3447.97	95.1926	1.42034e-12		WC CTRL	WC TTX	-15.4887	-9.48857	-3.48845	0.000668443
																														interaction	'X1*X2'	722.737	1	0	722.737	19.9536	5.4797e-05		WC CTRL	TKO TTX	-33.4382	-27.1443	-20.8505	3.76843e-09
																															'Error'	1593.72	44	0	36.221				TKO CTRL	WC TTX	-15.079	-7.85816	-0.637357	0.0281804
																															'Total'	6948.51	47	0					TKO CTRL	TKO TTX	-32.9806	-25.5139	-18.0472	3.8305e-09
																																							WC TTX	TKO TTX	-24.2389	-17.6558	-11.0727	4.31434e-08
